# Supplementary material for: Ag/Cu co-doped ZnS–In2S3solid solutions: facile synthesis, theoretical calculations and enhanced photocatalytic activity
Source: Royal Society of Chemistry journal article supplement (doi:10.1039/c4ra05960c), 2014-01-01
Supplement: c4ra05960c1.pdf [file c4ra05960c1.pdf]

## Electronic Supporting Information

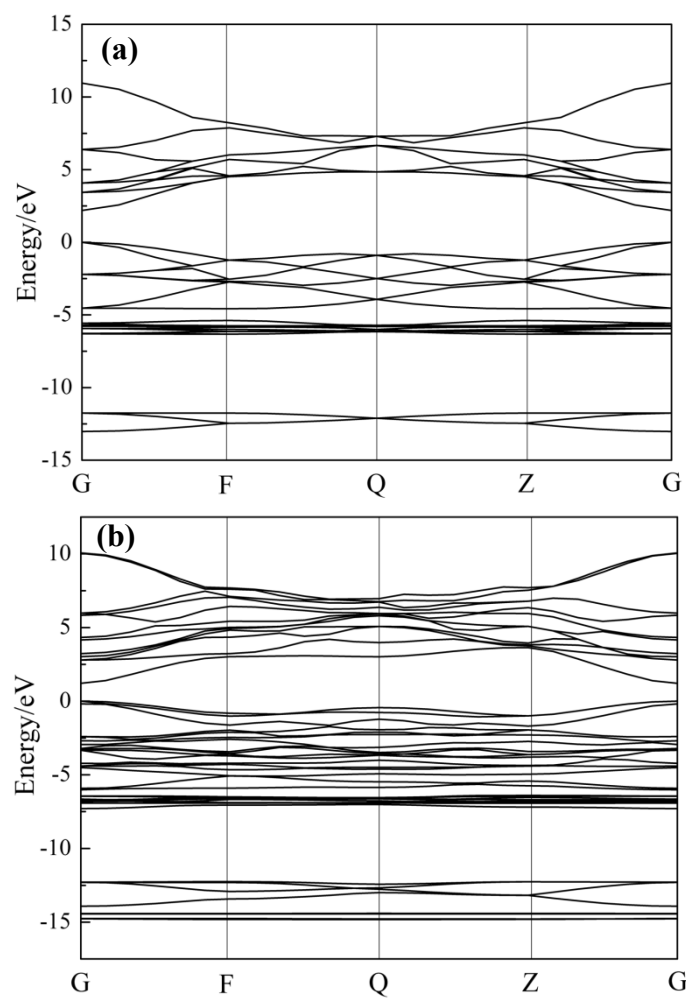

**Figure S1** Band structure of (a) ZnS and (b) Ag/Cu co-doped ZnS-In<sub>2</sub>S<sub>3</sub>.

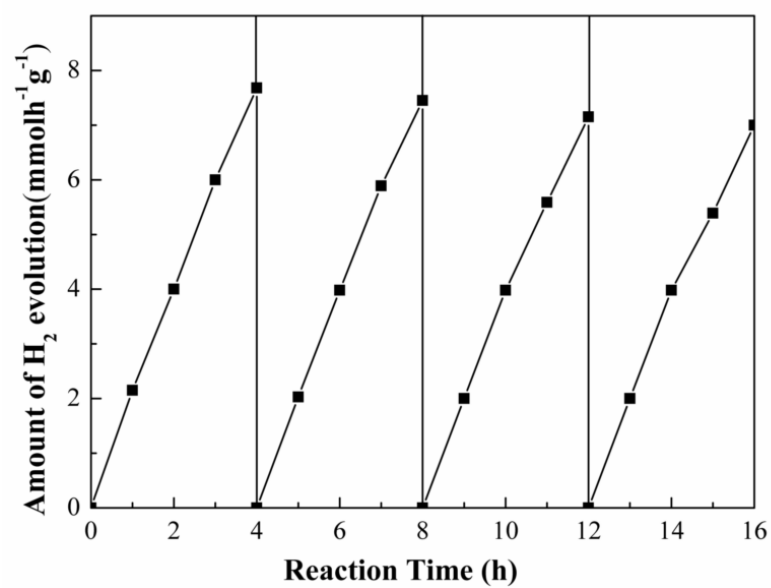

**Figure S2** Photo-stability of Ag/Cu co-doped ZnS-In<sub>2</sub>S<sub>3</sub>.

**Table S1** Molar ratio of metal ions in the samples

| <b>Ag/mL</b> | <b>Cu/mL</b> | <b>In/Zn</b> | <b>Ag/Zn</b>  | <b>Cu/Zn</b>  |
|--------------|--------------|--------------|---------------|---------------|
| <b>0</b>     | <b>0</b>     | <b>0.17</b>  | <b>-</b>      | <b>-</b>      |
| <b>0.1</b>   | <b>0</b>     | <b>0.16</b>  | <b>0.0039</b> | <b>-</b>      |
| <b>0.1</b>   | <b>0.1</b>   | <b>0.16</b>  | <b>0.0037</b> | <b>0.0035</b> |
| <b>0.1</b>   | <b>0.2</b>   | <b>0.16</b>  | <b>0.0037</b> | <b>0.0076</b> |
| <b>0.2</b>   | <b>0.2</b>   | <b>0.15</b>  | <b>0.0077</b> | <b>0.0077</b> |
| <b>0.2</b>   | <b>0.3</b>   | <b>0.16</b>  | <b>0.0076</b> | <b>0.012</b>  |
| <b>0.3</b>   | <b>0.2</b>   | <b>0.15</b>  | <b>0.012</b>  | <b>0.0074</b> |
